# Supplementary material for: Machine learning models for predicting post-cystectomy recurrence and survival in bladder cancer patients
Source: PubMed Central journal article supplement (PMC6382101; doi:10.1371/journal.pone.0210976), 2019-02-20
Supplement: pone.0210976.s001.pdf [file pone.0210976.s001.pdf]

# Machine learning models for predicting post-cystectomy recurrence and survival in bladder cancer patients

Zaki Hasnain<sup>1</sup>, Jeremy Mason<sup>2</sup>, Karanvir Gill<sup>2</sup>, Gus Miranda<sup>3</sup>, Inderbir S. Gill<sup>3</sup>, Peter Kuhn<sup>1,2,3,4,5\*</sup>, Paul K. Newton<sup>1,5,6</sup>

**1** Department of Aerospace and Mechanical Engineering, Viterbi School of Engineering, University of Southern California, University Park Campus, Los Angeles, CA, USA

**2** Department of Biological Sciences, Dornsife College of Letters, Arts, and Sciences, University of Southern California, University Park Campus, Los Angeles, CA, USA

**3** USC Institute of Urology, Keck School of Medicine, University of Southern California, Health Sciences Campus, Los Angeles, CA, USA

**4** Department of Biomedical Engineering, Viterbi School of Engineering, University of Southern California, University Park Campus, Los Angeles, CA, USA

**5** Norris Comprehensive Cancer Center, Keck School of Medicine, University of Southern California, Health Sciences Campus, Los Angeles, CA, USA

**6** Department of Mathematics, University of Southern California, University Park Campus, Los Angeles, CA, USA

\* Corresponding author. pkuhn@usc.edu (PK)

## Supporting Information File 1

**Appendix A. Machine learning process for finding best model.** The feature selection process for generating datasets for machine learning is described here. MI is calculated between  $p = 73$  predictors and used to cluster variables into  $K = 60$  clusters. MI is also calculated between  $p = 73$  predictors and RecX ( $x = 1, 3, 5$  years) and SurvX ( $x = 1, 3, 5$  years). Correlated predictors are removed by selecting a single predictor from  $K = 60$  clusters whose MI with the outcome is the highest. Irrelevant predictors are removed by pruning all predictors whose MI with the outcome is below a threshold (MI = 0.006 for RecX, MI = 0.003 for SurvX). These thresholds are selected heuristically, with some trial and error. The choice of number of clusters is another decision which can be explored with further trial and error computations, however this task was found to be too demanding. Therefore, it may be possible to achieve similar performance with more strict removal of correlated predictors by picking a smaller number of correlated clusters,  $K$  to prune from. All  $p = 73$  predictors are categorical except for age, therefore discretized (10 bins with equal frequency) and continuous versions of age were tried separately.

Class-imbalance was overcome by random oversampling to achieve a ratio of minority to majority class  $k = 0.8, 0.9, \text{ or } 1.0$ . Number of patients with recurrences (1) and no recurrences (0) in the 1-, 3-, and 5-year recurrence datasets are: (0: 2469, 1: 602) for 1-year, (0: 2020, 1: 935) for 3-year, (0: 1683, 1: 1012) for 5-year. Number of surviving (0) and not surviving (1) patients in the 1-, 3-, and 5-year survival datasets are: (0: 2503, 1: 698) for 1-year, (0: 1821, 1: 1245) for 3-year, (0: 1318, 1: 1462) for 5-year.

Thirteen base models include: SVM (polynomial, sigmoid, radial basis function kernels), KNN, AdaBoost, gradient boosted trees, random forest, pathologic stage based logistic regression, pathologic stage subgroup based logistic regression, and bagged versions of SVM and KNN. The main challenge in this study was to overcome the skewed performance of base models towards high sensitivity or high specificity. Consequently, a series of ensemble learning techniques are employed to take advantage of the base models. Nine different majority voting based mixture-of-expert (MOE) ensemble models, and 13 different logistic regression and SVM based stacking ensemble models are created using the results of the base models. Finally, the meta-classifiers are created by using a triplet of: a base model, a MOE ensemble model, and a stacking ensemble model. There are 1287 such triplets, and we find the performance of these models using nested  $k$ -fold cross validation, and the best models from this list are reported. These ensemble methods prove successful in overcoming the skewed base model performance. Due to the medial nature of the dataset, the predictors are categorical and the addition of numerical predictors directly from imaging and biopsy procedures may improve performance.

**Table A. Dataset description.**

|                                | All<br>(3503) | P0<br>(334) | Pa<br>(94) | PIS<br>(404) | P1<br>(481) | P2a<br>(300) | P2b<br>(389) | P3a<br>(357) | P3b<br>(536) | P4a<br>(451) | P4b<br>(141) |
|--------------------------------|---------------|-------------|------------|--------------|-------------|--------------|--------------|--------------|--------------|--------------|--------------|
| <b>Age (yr)</b>                |               |             |            |              |             |              |              |              |              |              |              |
| Median                         | 68            | 66          | 67         | 67           | 66          | 67           | 67           | 70           | 69           | 70           | 68           |
| Range                          | 23-95         | 25-92       | 34-87      | 27-94        | 33-95       | 31-89        | 30-92        | 38-91        | 31-92        | 38-94        | 23-95        |
| <b>Gender (n)</b>              |               |             |            |              |             |              |              |              |              |              |              |
| Female                         | 757           | 66          | 16         | 62           | 91          | 52           | 99           | 97           | 171          | 70           | 30           |
| Male                           | 2746          | 268         | 78         | 342          | 390         | 248          | 290          | 260          | 365          | 381          | 111          |
| <b>Histology (n)</b>           |               |             |            |              |             |              |              |              |              |              |              |
| Adeno                          | 40            | 3           | 1          | 0            | 4           | 1            | 6            | 7            | 7            | 7            | 4            |
| Neuro                          | 42            | 7           | 0          | 0            | 0           | 3            | 5            | 5            | 12           | 10           | 0            |
| Sarcoma                        | 19            | 2           | 0          | 0            | 1           | 5            | 3            | 3            | 1            | 3            | 1            |
| Squamous                       | 90            | 3           | 0          | 2            | 5           | 5            | 16           | 7            | 27           | 13           | 11           |
| Urothelial                     | 3301          | 315         | 92         | 402          | 470         | 286          | 358          | 335          | 486          | 417          | 125          |
| Other                          | 11            | 4           | 1          | 0            | 1           | 0            | 1            | 0            | 3            | 1            | 0            |
| <b>pN stage (n)</b>            |               |             |            |              |             |              |              |              |              |              |              |
| Nx                             | 151           | 14          | 5          | 11           | 16          | 8            | 8            | 5            | 16           | 30           | 32           |
| N0                             | 2477          | 309         | 88         | 381          | 435         | 248          | 293          | 206          | 284          | 181          | 49           |
| N1                             | 220           | 3           | 0          | 5            | 14          | 18           | 29           | 41           | 59           | 37           | 11           |
| N2                             | 639           | 7           | 1          | 7            | 16          | 25           | 59           | 101          | 176          | 197          | 46           |
| N3                             | 16            | 1           | 0          | 0            | 0           | 1            | 0            | 4            | 1            | 6            | 3            |
| <b>Pathologic subgroup (n)</b> |               |             |            |              |             |              |              |              |              |              |              |
| OC                             | 1812          | 323         | 93         | 391          | 450         | 254          | 299          | 0            | 0            | 0            | 0            |
| EV                             | 760           | 0           | 0          | 0            | 0           | 0            | 0            | 208          | 293          | 201          | 58           |
| N+                             | 931           | 11          | 1          | 13           | 31          | 46           | 90           | 149          | 243          | 250          | 83           |
| <b>Radiation (n)</b>           |               |             |            |              |             |              |              |              |              |              |              |
| Neoadjuvant                    | 325           | 35          | 7          | 34           | 50          | 26           | 33           | 20           | 35           | 54           | 28           |
| Adjuvant                       | 54            | 0           | 0          | 0            | 2           | 2            | 1            | 5            | 14           | 8            | 20           |
| <b>Chemotherapy (n)</b>        |               |             |            |              |             |              |              |              |              |              |              |
| Neoadjuvant                    | 519           | 93          | 7          | 59           | 32          | 32           | 39           | 52           | 62           | 89           | 52           |
| Adjuvant                       | 633           | 8           | 3          | 12           | 26          | 37           | 80           | 106          | 178          | 142          | 36           |
| <b>Smoker (n)</b>              |               |             |            |              |             |              |              |              |              |              |              |
| Current                        | 674           | 52          | 19         | 61           | 88          | 71           | 86           | 61           | 127          | 74           | 35           |
| Never                          | 807           | 84          | 18         | 82           | 117         | 57           | 92           | 94           | 132          | 94           | 34           |
| Previous                       | 1891          | 188         | 55         | 249          | 255         | 157          | 195          | 189          | 264          | 267          | 63           |
| <b>Metastasis (n)</b>          |               |             |            |              |             |              |              |              |              |              |              |
| Total Patients                 | 1061          | 36          | 16         | 67           | 96          | 68           | 100          | 154          | 242          | 231          | 48           |
| Bone                           | 332           | 6           | 1          | 14           | 27          | 18           | 26           | 54           | 91           | 80           | 14           |
| Pelvis                         | 308           | 8           | 1          | 15           | 13          | 14           | 33           | 48           | 83           | 70           | 23           |
| Lung                           | 288           | 11          | 4          | 19           | 29          | 24           | 29           | 43           | 70           | 49           | 10           |
| Liver                          | 255           | 12          | 2          | 20           | 24          | 8            | 19           | 35           | 68           | 56           | 10           |
| Retro                          | 208           | 6           | 0          | 21           | 19          | 12           | 14           | 42           | 44           | 43           | 7            |
| LN (reg)                       | 134           | 3           | 2          | 9            | 16          | 7            | 9            | 23           | 27           | 30           | 7            |
| LN (dist)                      | 95            | 4           | 0          | 5            | 5           | 12           | 9            | 19           | 14           | 22           | 5            |
| Peritoneum                     | 93            | 7           | 0          | 6            | 2           | 5            | 8            | 10           | 18           | 28           | 9            |
| Urethra                        | 88            | 5           | 7          | 15           | 20          | 11           | 5            | 2            | 8            | 14           | 1            |
| Brain                          | 65            | 1           | 0          | 4            | 6           | 2            | 10           | 11           | 14           | 14           | 3            |
| UT                             | 61            | 3           | 5          | 11           | 12          | 11           | 2            | 2            | 8            | 7            | 0            |
| Adrenal                        | 34            | 0           | 0          | 3            | 2           | 2            | 2            | 6            | 10           | 6            | 3            |
| Other                          | 174           | 7           | 2          | 11           | 15          | 14           | 13           | 29           | 37           | 36           | 10           |

Patient and tumor characteristics by pathologic T stage.

**Appendix B Clinical vs Pathologic staging trend since 1970s.** Clinical staging (staging based on a combination of imaging and transurethral resection) and pathological staging (staging done at time of cystectomy) do not always classify patients in the same stages, and clinical staging may underestimate (shown in blue), agree (shown in green) or overestimate (shown in red). Clinical T stages are: T0, Ta, TIS, T1, T2a, T2b, T3a, T3b, T4a, T4b. Pathologic stages are: P0, Pa, PIS, P1, P2a, P2b, P3a, P3b, P4a, P4b. TX and PX indicate patients whose stage was declared unknown, and these patients are removed for this analysis resulting in a dataset of  $N = 3417$  patients for Fig. A and all concordance analyses between clinical and pathologic staging.

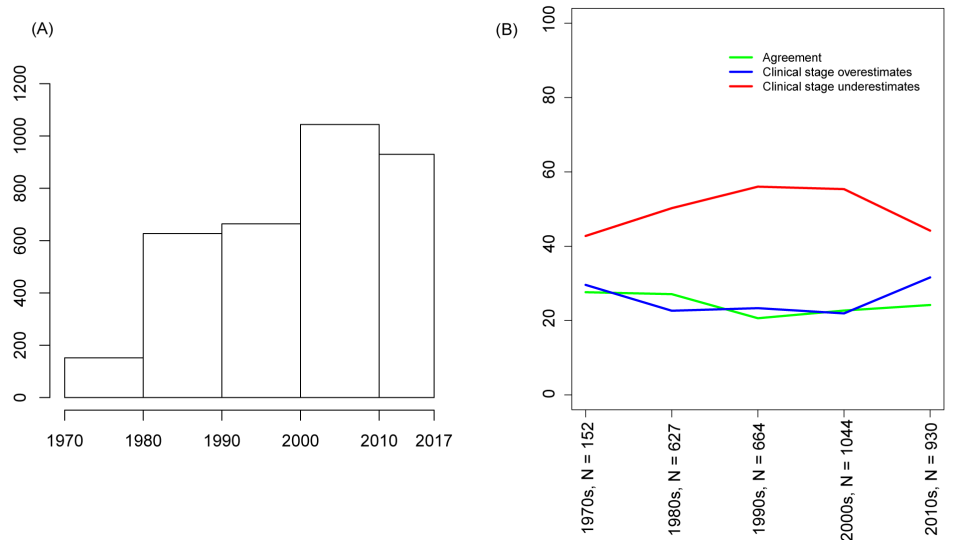

**Fig A. Discrepancy in staging over time.** (A) Histogram of number of patients undergoing cystectomy for each decade of data collection. (B) The agreement between clinical and pathological staging over the period of data collection (1971-2016).

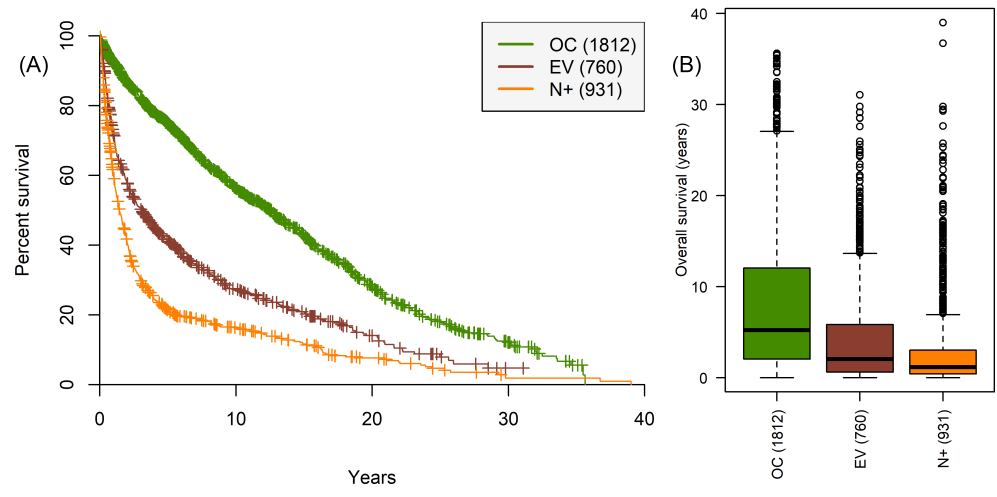

|    | # at risk (# censored) |           |           |          |         |
|----|------------------------|-----------|-----------|----------|---------|
| OC | 1812 (3)               | 564 (648) | 160 (839) | 30 (897) | 0 (915) |
| EV | 760 (0)                | 111 (180) | 28 (223)  | 1 (236)  | 0 (237) |
| N+ | 931 (1)                | 86 (152)  | 22 (179)  | 2 (188)  | 0 (188) |

**Fig B. Bladder stage survival analysis.** (A) Kaplan-Meier survival computed by bladder stage at time of cystectomy subgrouped into OC (T0, Ta, T1S, T1, T2a, T2b), EV (T3a, T3b, T4a, T4b), N+ irrespective of stage (metastasized) (p-value < 0.001). (B) Boxplot of OS by bladder stage at time of cystectomy.

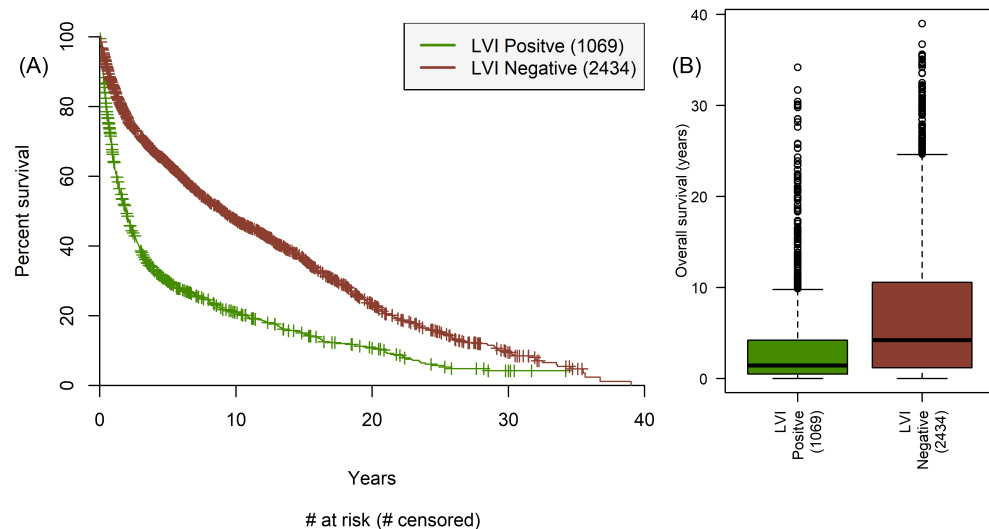

# at risk (# censored)

|              |          |           |           |           |          |
|--------------|----------|-----------|-----------|-----------|----------|
| LVI Positive | 1069 (1) | 116 (218) | 38 (249)  | 4 (265)   | 0 (269)  |
| LVI Negative | 2434 (3) | 645 (762) | 172 (992) | 29 (1056) | 0 (1071) |

**Fig C. Lymphovascular invasion survival analysis.** (A) Kaplan-Meier survival computed by lymphovascular invasion. (B) Boxplot of OS by lymphovascular invasion.

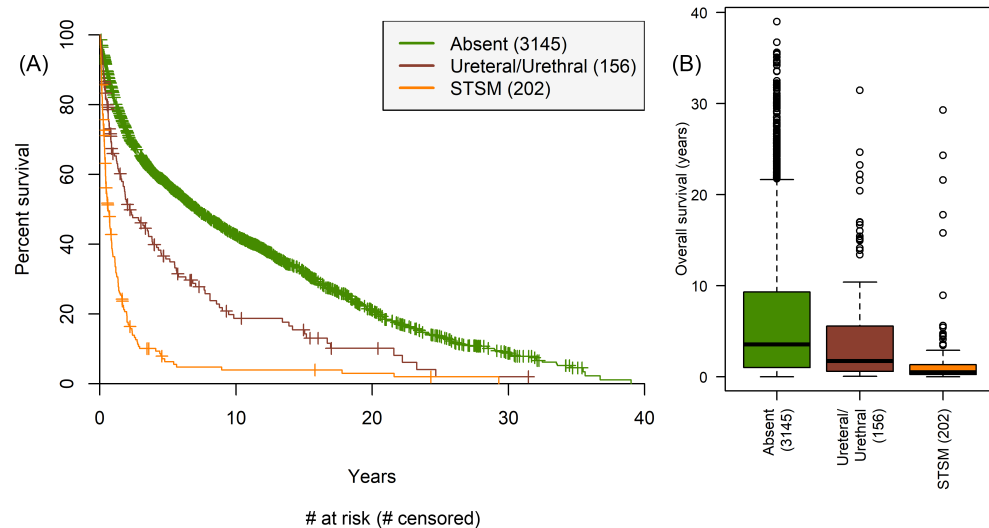

# at risk (# censored)

|                       |          |           |            |           |          |
|-----------------------|----------|-----------|------------|-----------|----------|
| Absent                | 3145 (4) | 738 (927) | 201 (1182) | 32 (1260) | 0 (1278) |
| Ureteral/<br>Urethral | 156 (0)  | 18 (29)   | 6 (34)     | 1 (35)    | 0 (36)   |
| STSM                  | 202 (0)  | 5 (24)    | 3 (25)     | 0 (26)    | 0 (26)   |

**Fig D. Surgical margin survival analysis** (A) Kaplan-Meier survival computed by soft tissue surgical margin. (B) Boxplot of OS by soft tissue surgical margin.

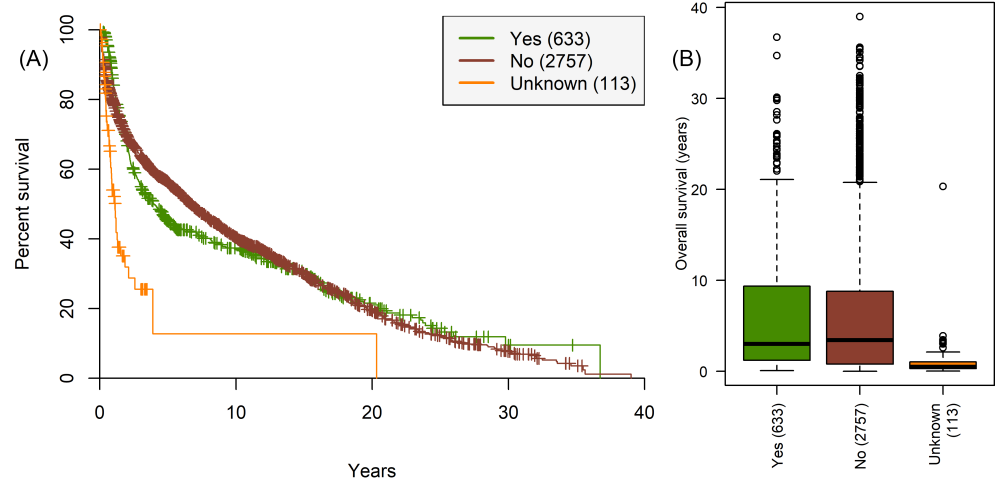

|         | # at risk (# censored) |           |           |           |          |
|---------|------------------------|-----------|-----------|-----------|----------|
| Yes     | 633 (0)                | 153 (123) | 40 (187)  | 3 (211)   | 0 (213)  |
| No      | 2757 (3)               | 607 (795) | 169 (992) | 30 (1048) | 0 (1065) |
| Unknown | 113 (1)                | 1 (62)    | 1 (62)    | 0 (62)    | 0 (62)   |

**Fig E. Adjuvant chemotherapy survival analysis.** (A) Kaplan-Meier survival computed by receipt of adjuvant chemotherapy. (B) Boxplot of OS by receipt of adjuvant chemotherapy.

**Appendix C. Chi-squared test of independence: predictors vs. recurrence and overall survival.** Complete results of the Chi-squared test of independence between predictors and binary recurrence and binary OS are shown here. Top 30 correlated predictors for 1-year and 3-year outcomes are shown in Table B and Table C respectively, these can be compared to correlations for 5-year outcomes shown in Table 1 in the main text. The complete list of 59 predictors for correlations with 5-year binary outcomes are shown in Table D and Table E. Note that the continuous predictor age is discretized into 10 bins of equal frequency and predictors are ranked by (Eqs.1, 2, 3). Patients who left the study before 1, 3, and 5 years, had no recurrence, and were alive at that point were omitted from the datasets used to calculate correlation with recurrence - resulting in 3071, 2955, and 2695 patients in the recurrence calculations for 1-, 3-, and 5-year correlations. Similarly, patients who left the study before 1, 3, and 5 years, and were alive at that point were omitted from the datasets used to calculate correlation with OS - resulting in 3201, 3066, and 2780 patients in the OS calculations for 1-, 3-, and 5-year correlations. Furthermore, The tests for association with OS exclude the 4 patients who are missing survival data, and the tests for recurrence exclude 163 patients whose recurrence status is unknown.



**Table B. The ranked list of predictors by importance for 1-year outcomes.**

| Rank | Predictor                                  | Recurrence |         | Overall survival |         |
|------|--------------------------------------------|------------|---------|------------------|---------|
|      |                                            | $\chi^2$   | p-value | $\chi^2$         | p-value |
| 1    | pT stage TNM 5th Edition **                | 370.1      | 0.000   | 558.0            | 0.000   |
| 2    | pT stage TNM 7th Edition **                | 363.1      | 0.000   | 564.0            | 0.000   |
| 3    | pathologic stage subgroup (OC, EV, N+) **  | 368.2      | 0.000   | 392.0            | 0.000   |
| 4    | pM stage TNM 7th Edition **                | 259.6      | 0.000   | 301.0            | 0.000   |
| 5    | pN stage TNM 7th Edition **                | 261.3      | 0.000   | 297.0            | 0.000   |
| 6    | pN stage TNM 5th Edition **                | 265.4      | 0.000   | 289.0            | 0.000   |
| 7    | # of positive lymph nodes **               | 268.0      | 0.000   | 230.0            | 0.000   |
| 8    | pathologic positive lymph nodes **         | 247.6      | 0.000   | 259.0            | 0.000   |
| 9    | pathologic lymphovascular invasion **      | 168.2      | 0.000   | 185.0            | 0.000   |
| 10   | pM stage TNM 5th Edition **                | 34.7       | 0.000   | 251.0            | 0.000   |
| 11   | clinical T stage (preoperative) *          | 138.1      | 0.000   | 182.0            | 0.000   |
| 12   | positive soft tissue surgical margin **    | 48.6       | 0.000   | 246.0            | 0.000   |
| 13   | clinical staging subgroup (preoperative) * | 109.2      | 0.000   | 142.0            | 0.000   |
| 14   | urinary diversion subgroups **             | 39.8       | 0.000   | 163.0            | 0.000   |
| 15   | clinical M stage (preoperative) *          | 63.6       | 0.000   | 121.0            | 0.000   |
| 16   | # lymph nodes removed **                   | 5.4        | 0.607   | 134.0            | 0.000   |
| 17   | neoadjuvant chemotherapy subgroups *       | 87.2       | 0.000   | 58.5             | 0.000   |
| 18   | type of surgical procedure **              | 26.4       | 0.002   | 120.0            | 0.000   |
| 19   | clinical N Stage (preoperative) *          | 79.6       | 0.000   | 70.3             | 0.000   |
| 20   | type of neoadjuvant chemotherapy *         | 80.0       | 0.000   | 45.0             | 0.000   |
| 21   | # of neoadjuvant chemo cycles *            | 80.7       | 0.000   | 42.6             | 0.000   |
| 22   | age at time of cystectomy (discretized) ** | 12.6       | 0.184   | 101.0            | 0.000   |
| 23   | pathologic predominant cell type **        | 60.6       | 0.000   | 63.4             | 0.000   |
| 24   | pathologic carcinoma in situ **            | 55.0       | 0.000   | 32.8             | 0.000   |
| 25   | pathologic multifocal tumors **            | 51.6       | 0.000   | 12.0             | 0.002   |
| 26   | type of adjuvant chemotherapy ***          | 10.4       | 0.005   | 58.9             | 0.000   |
| 27   | type of urinary diversion constructed **   | 17.1       | 0.000   | 54.8             | 0.000   |
| 28   | pathologic squamous differentiation **     | 35.4       | 0.000   | 36.5             | 0.000   |
| 29   | # of adjuvant chemo cycles ***             | 6.4        | 0.375   | 55.5             | 0.000   |
| 30   | indication for surgery **                  | 25.4       | 0.000   | 27.7             | 0.000   |

Association between predictors and the two long term outcomes, recurrence and OS as measured by the chi-squared test of independence. Predictors are ranked by Eq.1. Predictors are measured at three time points: \* before cystectomy, \*\* at time of cystectomy, \*\*\* post-cystectomy.

**Table C. The ranked list of predictors by importance for 3-year outcomes.**

| Rank | Predictor                                       | Recurrence |         | Overall survival |         |
|------|-------------------------------------------------|------------|---------|------------------|---------|
|      |                                                 | $\chi^2$   | p-value | $\chi^2$         | p-value |
| 1    | pathologic stage subgroup (OC, EV, N+) **       | 479.6      | 0.000   | 672.0            | 0.000   |
| 2    | pT stage TNM 5th Edition **                     | 405.2      | 0.000   | 663.0            | 0.000   |
| 3    | pT stage TNM 7th Edition **                     | 398.8      | 0.000   | 667.0            | 0.000   |
| 4    | pN stage TNM 7th Edition **                     | 379.2      | 0.000   | 488.0            | 0.000   |
| 5    | pM stage TNM 7th Edition **                     | 377.0      | 0.000   | 491.0            | 0.000   |
| 6    | pN stage TNM 5th Edition **                     | 380.0      | 0.000   | 480.0            | 0.000   |
| 7    | pathologic positive lymph nodes **              | 355.0      | 0.000   | 465.0            | 0.000   |
| 8    | # of positive lymph nodes **                    | 380.3      | 0.000   | 415.0            | 0.000   |
| 9    | pathologic lymphovascular invasion **           | 220.4      | 0.000   | 296.0            | 0.000   |
| 10   | clinical T stage (preoperative) *               | 128.2      | 0.000   | 230.0            | 0.000   |
| 11   | positive soft tissue surgical margin **         | 27.5       | 0.000   | 225.0            | 0.000   |
| 12   | urinary diversion subgroups **                  | 31.6       | 0.000   | 187.0            | 0.000   |
| 13   | clinical staging subgroup (preoperative) *      | 75.5       | 0.000   | 151.0            | 0.000   |
| 14   | pM stage TNM 5th Edition **                     | 7.8        | 0.021   | 169.0            | 0.000   |
| 15   | pathologic predominant cell type **             | 83.0       | 0.000   | 106.0            | 0.000   |
| 16   | adjuvant chemotherapy subgroups ***             | 95.3       | 0.000   | 27.5             | 0.000   |
| 17   | type of surgical procedure **                   | 27.4       | 0.001   | 131.0            | 0.000   |
| 18   | type of adjuvant chemotherapy ***               | 84.9       | 0.000   | 60.0             | 0.000   |
| 19   | age at time of cystectomy (discretized) **      | 7.0        | 0.638   | 132.0            | 0.000   |
| 20   | clinical N Stage (preoperative) *               | 59.3       | 0.000   | 92.6             | 0.000   |
| 21   | # lymph nodes removed **                        | 8.4        | 0.300   | 119.0            | 0.000   |
| 22   | pathologic carcinoma in situ **                 | 75.7       | 0.000   | 49.8             | 0.000   |
| 23   | neoadjuvant chemotherapy subgroups *            | 70.6       | 0.000   | 52.1             | 0.000   |
| 24   | # of neoadjuvant chemo cycles *                 | 71.8       | 0.000   | 46.1             | 0.000   |
| 25   | pathologic multifocal tumors **                 | 71.3       | 0.000   | 31.6             | 0.000   |
| 26   | type of neoadjuvant chemotherapy *              | 62.0       | 0.000   | 49.1             | 0.000   |
| 27   | pathologic size of bladder tumor, dim-3 (cm) ** | 47.7       | 0.000   | 37.3             | 0.000   |
| 28   | type of urinary diversion constructed **        | 15.9       | 0.000   | 72.8             | 0.000   |
| 29   | clinical M stage (preoperative) *               | 27.0       | 0.000   | 63.3             | 0.000   |
| 30   | pathologic size of bladder tumor, dim-2 (cm) ** | 45.4       | 0.000   | 34.6             | 0.000   |

Association between predictors and the two long term outcomes, recurrence and OS as measured by the chi-squared test of independence. Predictors are ranked by Eq.1. Predictors are measured at three time points: \* before cystectomy, \*\* at time of cystectomy, \*\*\* post-cystectomy.

**Table D. The ranked list of predictors by importance for 5-year outcomes. Ranked by Eq.1-3. Predictors 1-40.**

| Rank | Predictor                                       | Recurrence |         |       | Overall survival |         |       |
|------|-------------------------------------------------|------------|---------|-------|------------------|---------|-------|
|      |                                                 | $\chi^2$   | p-value | V     | $\chi^2$         | p-value | V     |
| 1    | pathologic stage subgroup (OC, EV, N+) **       | 364.0      | 0.000   | 0.368 | 600.0            | 0.000   | 0.465 |
| 2    | pT stage TNM 5th Edition **                     | 307.3      | 0.000   | 0.338 | 584.0            | 0.000   | 0.458 |
| 3    | pT stage TNM 7th Edition **                     | 301.8      | 0.000   | 0.335 | 584.0            | 0.000   | 0.459 |
| 4    | pN stage TNM 7th Edition **                     | 291.3      | 0.000   | 0.329 | 410.0            | 0.000   | 0.384 |
| 5    | pM stage TNM 7th Edition **                     | 288.7      | 0.000   | 0.327 | 412.0            | 0.000   | 0.385 |
| 6    | pN stage TNM 5th Edition **                     | 292.0      | 0.000   | 0.329 | 402.0            | 0.000   | 0.380 |
| 7    | # of positive lymph nodes **                    | 294.1      | 0.000   | 0.330 | 349.0            | 0.000   | 0.355 |
| 8    | pathologic positive lymph nodes **              | 267.0      | 0.000   | 0.315 | 393.0            | 0.000   | 0.376 |
| 9    | pathologic lymphovascular invasion **           | 172.1      | 0.000   | 0.253 | 264.0            | 0.000   | 0.308 |
| 10   | clinical T stage (preoperative) *               | 99.6       | 0.000   | 0.192 | 176.0            | 0.000   | 0.252 |
| 11   | type of urinary diversion constructed **        | 43.4       | 0.000   | 0.127 | 169.0            | 0.000   | 0.246 |
| 12   | neoadjuvant chemotherapy subgroups *            | 102.2      | 0.000   | 0.195 | 78.4             | 0.000   | 0.168 |
| 13   | age at time of cystectomy (discretized) **      | 11.7       | 0.232   | 0.066 | 174.0            | 0.000   | 0.250 |
| 14   | positive soft tissue surgical margin **         | 14.5       | 0.000   | 0.073 | 160.0            | 0.000   | 0.240 |
| 15   | urinary diversion subgroups **                  | 22.8       | 0.000   | 0.092 | 156.0            | 0.000   | 0.237 |
| 16   | # of neoadjuvant chemo cycles *                 | 91.6       | 0.000   | 0.184 | 58.6             | 0.000   | 0.145 |
| 17   | type of surgical procedure **                   | 44.0       | 0.000   | 0.128 | 134.0            | 0.000   | 0.220 |
| 18   | clinical staging subgroup (preoperative) *      | 60.2       | 0.000   | 0.149 | 110.0            | 0.000   | 0.199 |
| 19   | pathologic predominant cell type **             | 65.6       | 0.000   | 0.156 | 86.3             | 0.000   | 0.176 |
| 20   | type of neoadjuvant chemotherapy *              | 72.8       | 0.000   | 0.164 | 63.7             | 0.000   | 0.151 |
| 21   | adjuvant chemotherapy subgroups ***             | 76.3       | 0.000   | 0.168 | 33.8             | 0.000   | 0.110 |
| 22   | type of adjuvant chemotherapy ***               | 67.6       | 0.000   | 0.158 | 54.7             | 0.000   | 0.140 |
| 23   | pathologic carcinoma in situ **                 | 66.9       | 0.000   | 0.158 | 47.1             | 0.000   | 0.130 |
| 24   | pM stage TNM 5th Edition **                     | 1.8        | 0.399   | 0.026 | 111.0            | 0.000   | 0.200 |
| 25   | pathologic multifocal tumors **                 | 62.1       | 0.000   | 0.152 | 29.2             | 0.000   | 0.102 |
| 26   | clinical N Stage (preoperative) *               | 45.7       | 0.000   | 0.130 | 69.9             | 0.000   | 0.159 |
| 27   | # lymph nodes removed **                        | 19.7       | 0.006   | 0.085 | 74.7             | 0.000   | 0.164 |
| 28   | intracorporeal diversion performed **           | 39.1       | 0.000   | 0.120 | 40.0             | 0.000   | 0.120 |
| 29   | # of adjuvant chemo cycles ***                  | 40.0       | 0.000   | 0.122 | 6.1              | 0.413   | 0.047 |
| 30   | pathologic tumor grade **                       | 35.2       | 0.000   | 0.114 | 22.5             | 0.000   | 0.090 |
| 31   | current urinary diversion performed **          | 16.8       | 0.000   | 0.079 | 53.8             | 0.000   | 0.139 |
| 32   | robotic surgical procedure **                   | 29.3       | 0.000   | 0.104 | 36.4             | 0.000   | 0.114 |
| 33   | pathologic size of bladder tumor, dim-3 (cm) ** | 30.6       | 0.000   | 0.107 | 31.3             | 0.000   | 0.106 |
| 34   | pathologic size of bladder tumor, dim-2 (cm) ** | 30.3       | 0.000   | 0.106 | 30.9             | 0.000   | 0.105 |
| 35   | clinical M stage (preoperative) *               | 16.3       | 0.000   | 0.078 | 40.6             | 0.000   | 0.121 |
| 36   | predominant clinical cell type (preoperative) * | 27.4       | 0.000   | 0.101 | 20.6             | 0.004   | 0.086 |
| 37   | pathologic glandular differentiation **         | 29.3       | 0.000   | 0.104 | 11.1             | 0.011   | 0.063 |
| 38   | pathologic squamous differentiation **          | 24.5       | 0.000   | 0.095 | 17.6             | 0.000   | 0.080 |
| 39   | indication for surgery **                       | 20.6       | 0.000   | 0.087 | 24.9             | 0.000   | 0.095 |
| 40   | pathologic other variant histology **           | 20.6       | 0.004   | 0.087 | 20.0             | 0.006   | 0.085 |

Predictors are measured at three time points: \* before cystectomy, \*\* at time of cystectomy, \*\*\* post-cystectomy.

**Table E. The ranked list of predictors by importance for 5-year outcomes. Ranked by Eq.1-3. Predictors 41-59.**

| Rank | Predictor                                         | Recurrence |         |       | Overall survival |         |       |
|------|---------------------------------------------------|------------|---------|-------|------------------|---------|-------|
|      |                                                   | $\chi^2$   | p-value | V     | $\chi^2$         | p-value | V     |
| 41   | clinical CIS *                                    | 9.1        | 0.003   | 0.058 | 35.1             | 0.000   | 0.112 |
| 42   | pathologic neuroendocrine differentiation **      | 22.9       | 0.000   | 0.092 | 10.3             | 0.006   | 0.061 |
| 43   | pathologic size of bladder tumor, dim-1 (cm) **   | 18.7       | 0.002   | 0.083 | 14.8             | 0.011   | 0.073 |
| 44   | Charlson: renal disease, moderate or severe *     | 2.0        | 0.361   | 0.027 | 31.2             | 0.000   | 0.106 |
| 45   | Charlson: any other malignancy *                  | 0.4        | 0.831   | 0.012 | 29.5             | 0.000   | 0.103 |
| 46   | any prior pelvic radiation *                      | 2.5        | 0.116   | 0.030 | 28.3             | 0.000   | 0.101 |
| 47   | history of smoking *                              | 12.7       | 0.005   | 0.069 | 15.0             | 0.002   | 0.073 |
| 48   | Charlson: chronic obstructive pulmonary disease * | 5.5        | 0.064   | 0.045 | 22.8             | 0.000   | 0.091 |
| 49   | # of neoadjuvant radiation to bladder *           | 2.4        | 0.795   | 0.030 | 23.9             | 0.000   | 0.093 |
| 50   | gender **                                         | 12.5       | 0.000   | 0.068 | 8.4              | 0.004   | 0.055 |
| 51   | adjuvant radiation post cystectomy ***            | 1.4        | 0.242   | 0.023 | 19.0             | 0.000   | 0.083 |
| 52   | Charlson: connective tissue disorder *            | 8.3        | 0.016   | 0.056 | 13.6             | 0.001   | 0.070 |
| 53   | pathologic # of tumors **                         | 9.7        | 0.046   | 0.060 | 10.0             | 0.041   | 0.060 |
| 54   | Charlson: congestive heart failure *              | 3.5        | 0.174   | 0.036 | 15.4             | 0.000   | 0.074 |
| 55   | Charlson: myocardial infarction *                 | 3.3        | 0.194   | 0.035 | 14.8             | 0.000   | 0.073 |
| 56   | pathologic micropapillary **                      | 8.5        | 0.003   | 0.056 | 4.5              | 0.034   | 0.040 |
| 57   | Charlson: diabetes *                              | 0.2        | 0.884   | 0.010 | 11.3             | 0.003   | 0.064 |
| 58   | Charlson: peripheral vascular disease *           | 0.3        | 0.845   | 0.011 | 11.0             | 0.004   | 0.063 |
| 59   | neoadjuvant bladder radiation *                   | 1.0        | 0.319   | 0.019 | 7.4              | 0.006   | 0.052 |

Predictors are measured at three time points: \* before cystectomy, \*\* at time of cystectomy, \*\*\* post-cystectomy.

Included here is a ranking of the predictors based on Cramer's V shown in Appendix C and listed in Table F and Table G. Cramer's V normalizes the chi-squared values by the number of categories in the predictors and offers an alternate ranking of the predictor importance with recurrence and overall survival. A composite predictor ranking,

$$rank_i = \sqrt{(\bar{V}_{Rec,i}^2)^2 + (\bar{V}_{OS,i}^2)^2} \quad (1)$$

based on Cramer's V values for recurrence ( $V_{Rec}$ ),

$$\bar{V}_{Rec,i} = \frac{V_{Rec,i}}{\sigma_{V_{Rec}}} \quad (2)$$

and the Cramer's V values for overall survival ( $V_{OS}$ ),

$$\bar{V}_{OS,i} = \frac{V_{OS,i}}{\sigma_{V_{OS}}} \quad (3)$$

is used to identify predictor importance. The Cramer's V values for both outcomes are normalized by their respective standard deviations (Eqs.1, 2, 3) to weigh the effect of both outcomes equally.

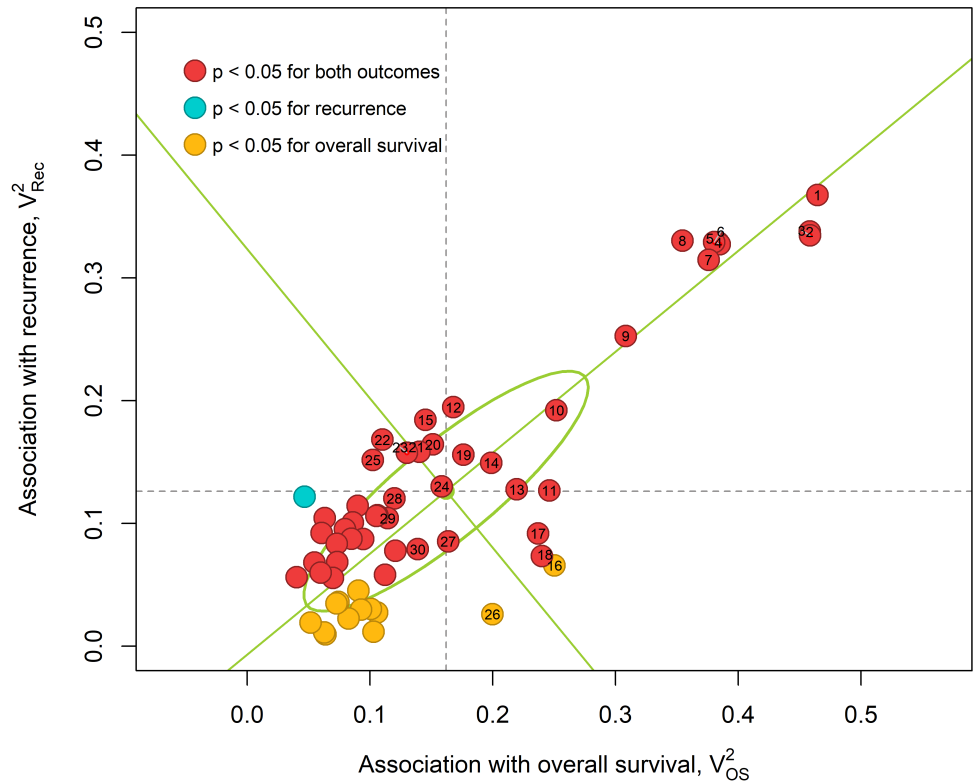

Fig F. Predictors ranked by Cramer's V.

**Table F. The ranked list of predictors by importance for 5-year outcomes. Ranked by Eq.4-6. Predictors 1-40.**

| Rank | Predictor                                       | Recurrence |         |       | Overall survival |         |       |
|------|-------------------------------------------------|------------|---------|-------|------------------|---------|-------|
|      |                                                 | $\chi^2$   | p-value | V     | $\chi^2$         | p-value | V     |
| 1    | pathologic stage subgroup (OC, EV, N+) **       | 364.0      | 0.000   | 0.368 | 600.0            | 0.000   | 0.465 |
| 2    | pT stage TNM 5th Edition **                     | 307.3      | 0.000   | 0.338 | 584.0            | 0.000   | 0.458 |
| 3    | pT stage TNM 7th Edition **                     | 301.8      | 0.000   | 0.335 | 584.0            | 0.000   | 0.459 |
| 4    | pN stage TNM 7th Edition **                     | 291.3      | 0.000   | 0.329 | 410.0            | 0.000   | 0.384 |
| 5    | pM stage TNM 7th Edition **                     | 288.7      | 0.000   | 0.327 | 412.0            | 0.000   | 0.385 |
| 6    | pN stage TNM 5th Edition **                     | 292.0      | 0.000   | 0.329 | 402.0            | 0.000   | 0.380 |
| 7    | pathologic positive lymph nodes **              | 267.0      | 0.000   | 0.315 | 393.0            | 0.000   | 0.376 |
| 8    | # of positive lymph nodes **                    | 294.1      | 0.000   | 0.330 | 349.0            | 0.000   | 0.355 |
| 9    | pathologic lymphovascular invasion **           | 172.1      | 0.000   | 0.253 | 264.0            | 0.000   | 0.308 |
| 10   | clinical T stage (preoperative) *               | 99.6       | 0.000   | 0.192 | 176.0            | 0.000   | 0.252 |
| 11   | type of urinary diversion constructed **        | 43.4       | 0.000   | 0.127 | 169.0            | 0.000   | 0.246 |
| 12   | neoadjuvant chemotherapy subgroups *            | 102.2      | 0.000   | 0.195 | 78.4             | 0.000   | 0.168 |
| 13   | type of surgical procedure **                   | 44.0       | 0.000   | 0.128 | 134.0            | 0.000   | 0.220 |
| 14   | clinical staging subgroup (preoperative) *      | 60.2       | 0.000   | 0.149 | 110.0            | 0.000   | 0.199 |
| 15   | # of neoadjuvant chemo cycles *                 | 91.6       | 0.000   | 0.184 | 58.6             | 0.000   | 0.145 |
| 16   | age at time of cystectomy (discretized) **      | 11.7       | 0.232   | 0.066 | 174.0            | 0.000   | 0.250 |
| 17   | urinary diversion subgroups **                  | 22.8       | 0.000   | 0.092 | 156.0            | 0.000   | 0.237 |
| 18   | positive soft tissue surgical margin **         | 14.5       | 0.000   | 0.073 | 160.0            | 0.000   | 0.240 |
| 19   | pathologic predominant cell type **             | 65.6       | 0.000   | 0.156 | 86.3             | 0.000   | 0.176 |
| 20   | type of neoadjuvant chemotherapy *              | 72.8       | 0.000   | 0.164 | 63.7             | 0.000   | 0.151 |
| 21   | type of adjuvant chemotherapy ***               | 67.6       | 0.000   | 0.158 | 54.7             | 0.000   | 0.140 |
| 22   | adjuvant chemotherapy subgroups ***             | 76.3       | 0.000   | 0.168 | 33.8             | 0.000   | 0.110 |
| 23   | pathologic carcinoma in situ **                 | 66.9       | 0.000   | 0.158 | 47.1             | 0.000   | 0.130 |
| 24   | clinical N Stage (preoperative) *               | 45.7       | 0.000   | 0.130 | 69.9             | 0.000   | 0.159 |
| 25   | pathologic multifocal tumors **                 | 62.1       | 0.000   | 0.152 | 29.2             | 0.000   | 0.102 |
| 26   | pM stage TNM 5th Edition **                     | 1.8        | 0.399   | 0.026 | 111.0            | 0.000   | 0.200 |
| 27   | # lymph nodes removed **                        | 19.7       | 0.006   | 0.085 | 74.7             | 0.000   | 0.164 |
| 28   | intracorporeal diversion performed **           | 39.1       | 0.000   | 0.120 | 40.0             | 0.000   | 0.120 |
| 29   | robotic surgical procedure **                   | 29.3       | 0.000   | 0.104 | 36.4             | 0.000   | 0.114 |
| 30   | current urinary diversion performed **          | 16.8       | 0.000   | 0.079 | 53.8             | 0.000   | 0.139 |
| 31   | pathologic size of bladder tumor, dim-3 (cm) ** | 30.6       | 0.000   | 0.107 | 31.3             | 0.000   | 0.106 |
| 32   | pathologic size of bladder tumor, dim-2 (cm) ** | 30.3       | 0.000   | 0.106 | 30.9             | 0.000   | 0.105 |
| 33   | pathologic tumor grade **                       | 35.2       | 0.000   | 0.114 | 22.5             | 0.000   | 0.090 |
| 34   | clinical M stage (preoperative) *               | 16.3       | 0.000   | 0.078 | 40.6             | 0.000   | 0.121 |
| 35   | # of adjuvant chemo cycles ***                  | 40.0       | 0.000   | 0.122 | 6.1              | 0.413   | 0.047 |
| 36   | predominant clinical cell type (preoperative) * | 27.4       | 0.000   | 0.101 | 20.6             | 0.004   | 0.086 |
| 37   | indication for surgery **                       | 20.6       | 0.000   | 0.087 | 24.9             | 0.000   | 0.095 |
| 38   | pathologic glandular differentiation **         | 29.3       | 0.000   | 0.104 | 11.1             | 0.011   | 0.063 |
| 39   | pathologic squamous differentiation **          | 24.5       | 0.000   | 0.095 | 17.6             | 0.000   | 0.080 |
| 40   | pathologic other variant histology **           | 20.6       | 0.004   | 0.087 | 20.0             | 0.006   | 0.085 |

Predictors are measured at three time points: \* before cystectomy, \*\* at time of cystectomy, \*\*\* post-cystectomy.

**Table G. The ranked list of predictors by importance for 5-year outcomes. Ranked by Eq.4-6. Predictors 41-59.**

| Rank | Predictor                                         | Recurrence |         |       | Overall survival |         |       |
|------|---------------------------------------------------|------------|---------|-------|------------------|---------|-------|
|      |                                                   | $\chi^2$   | p-value | V     | $\chi^2$         | p-value | V     |
| 41   | clinical CIS *                                    | 9.1        | 0.003   | 0.058 | 35.1             | 0.000   | 0.112 |
| 42   | pathologic neuroendocrine differentiation **      | 22.9       | 0.000   | 0.092 | 10.3             | 0.006   | 0.061 |
| 43   | pathologic size of bladder tumor, dim-1 (cm) **   | 18.7       | 0.002   | 0.083 | 14.8             | 0.011   | 0.073 |
| 44   | Charlson: renal disease, moderate or severe *     | 2.0        | 0.361   | 0.027 | 31.2             | 0.000   | 0.106 |
| 45   | history of smoking *                              | 12.7       | 0.005   | 0.069 | 15.0             | 0.002   | 0.073 |
| 46   | any prior pelvic radiation *                      | 2.5        | 0.116   | 0.030 | 28.3             | 0.000   | 0.101 |
| 47   | Charlson: chronic obstructive pulmonary disease * | 5.5        | 0.064   | 0.045 | 22.8             | 0.000   | 0.091 |
| 48   | Charlson: any other malignancy *                  | 0.4        | 0.831   | 0.012 | 29.5             | 0.000   | 0.103 |
| 49   | # of neoadjuvant radiation to bladder *           | 2.4        | 0.795   | 0.030 | 23.9             | 0.000   | 0.093 |
| 50   | gender **                                         | 12.5       | 0.000   | 0.068 | 8.4              | 0.004   | 0.055 |
| 51   | Charlson: connective tissue disorder *            | 8.3        | 0.016   | 0.056 | 13.6             | 0.001   | 0.070 |
| 52   | pathologic # of tumors **                         | 9.7        | 0.046   | 0.060 | 10.0             | 0.041   | 0.060 |
| 53   | adjuvant radiation post cystectomy ***            | 1.4        | 0.242   | 0.023 | 19.0             | 0.000   | 0.083 |
| 54   | Charlson: congestive heart failure *              | 3.5        | 0.174   | 0.036 | 15.4             | 0.000   | 0.074 |
| 55   | Charlson: myocardial infarction *                 | 3.3        | 0.194   | 0.035 | 14.8             | 0.000   | 0.073 |
| 56   | pathologic micropapillary **                      | 8.5        | 0.003   | 0.056 | 4.5              | 0.034   | 0.040 |
| 57   | Charlson: diabetes *                              | 0.2        | 0.884   | 0.010 | 11.3             | 0.003   | 0.064 |
| 58   | Charlson: peripheral vascular disease *           | 0.3        | 0.845   | 0.011 | 11.0             | 0.004   | 0.063 |
| 59   | neoadjuvant bladder radiation *                   | 1.0        | 0.319   | 0.019 | 7.4              | 0.006   | 0.052 |

Predictors are measured at three time points: \* before cystectomy, \*\* at time of cystectomy, \*\*\* post-cystectomy.

**Table H. p-value of paired log rank tests for clinical T stage subgroups.**

|     | Ta    | TIS   | T1    | T2a      | T2b      | T3a   | T3b      | T4a      | T4b      |
|-----|-------|-------|-------|----------|----------|-------|----------|----------|----------|
| T0  | 0.656 | 0.896 | 0.442 | 0.049    | 4.00E-05 | 0.086 | 3.48E-05 | 3.85E-05 | 1.06E-06 |
| Ta  | ————  | 0.505 | 0.732 | 0.030    | 1.12E-07 | 0.104 | 1.03E-07 | 3.10E-07 | 9.80E-08 |
| TIS | ————  | ————  | 0.152 | 6.29E-04 | 4.27E-12 | 0.029 | 2.48E-13 | 1.58E-11 | 6.78E-10 |
| T1  | ————  | ————  | ————  | 2.03E-04 | 1.44E-15 | 0.078 | 0        | 9.44E-15 | 4.98E-10 |
| T2a | ————  | ————  | ————  | ————     | 8.71E-09 | 0.536 | 3.97E-09 | 5.56E-08 | 3.98E-06 |
| T2b | ————  | ————  | ————  | ————     | ————     | 0.232 | 0.519    | 0.699    | 0.024    |
| T3a | ————  | ————  | ————  | ————     | ————     | ————  | 0.199    | 0.207    | 0.018    |
| T3b | ————  | ————  | ————  | ————     | ————     | ————  | ————     | 0.928    | 0.055    |
| T4a | ————  | ————  | ————  | ————     | ————     | ————  | ————     | ————     | 0.061    |

**Table I. p-value of paired log rank tests for pathologic T stage subgroups.**

|     | Pa    | PIS   | P1    | P2a   | P2b      | P3a      | P3b      | P4a      | P4b      |
|-----|-------|-------|-------|-------|----------|----------|----------|----------|----------|
| P0  | 0.638 | 0.666 | 0.047 | 0.027 | 2.47E-07 | 0        | 0        | 0        | 0        |
| Pa  | ————  | 0.791 | 0.357 | 0.243 | 0.005    | 3.45E-09 | 3.29E-10 | 0        | 0        |
| PIS | ————  | ————  | 0.083 | 0.062 | 1.07E-07 | 0        | 0        | 0        | 0        |
| P1  | ————  | ————  | ————  | 0.724 | 1.48E-04 | 0        | 0        | 0        | 0        |
| P2a | ————  | ————  | ————  | ————  | 0.004    | 1.13E-14 | 0        | 0        | 0        |
| P2b | ————  | ————  | ————  | ————  | ————     | 6.59E-09 | 5.18E-12 | 0        | 0        |
| P3a | ————  | ————  | ————  | ————  | ————     | ————     | 0.239    | 3.13E-07 | 0        |
| P3b | ————  | ————  | ————  | ————  | ————     | ————     | ————     | 8.12E-06 | 0        |
| P4a | ————  | ————  | ————  | ————  | ————     | ————     | ————     | ————     | 2.89E-13 |
